# Supplementary material for: Protecting Breastfeeding during the COVID-19 Pandemic: A Scoping Review of Perinatal Care Recommendations in the Context of Maternal and Child Well-Being
Source: MDPI journal article supplement (doi:10.3390/ijerph19063347), 2022-03-11
Supplement: s1 [file s1]

**Supplementary Table S5.** Recommendations concerning skin to skin contact for mothers with confirmed and/or suspected COVID-19.

| Author and date of publication | SSC <sup>1</sup> is recommended - no mention about any additional precautions | SSC is possible with precautions directly mentioned (eg. surgical mask, hands disinfection) | Decision of applying SSC should be discussed with the woman (shared decision-making model) | SSC recommended in line with pre-pandemic recommendations (routine care) | SSC is not recommended or suspended | Suspension of SSC as an emerging issue and a problem | SSC possible on clinical and organizational conditions |
|--------------------------------|-------------------------------------------------------------------------------|---------------------------------------------------------------------------------------------|--------------------------------------------------------------------------------------------|--------------------------------------------------------------------------|-------------------------------------|------------------------------------------------------|--------------------------------------------------------|
| Non-country specific level     |                                                                               |                                                                                             |                                                                                            |                                                                          |                                     |                                                      |                                                        |
| WHO, 04-2020 [78]              |                                                                               | +                                                                                           |                                                                                            |                                                                          |                                     |                                                      |                                                        |
| CalilVMLT, 04- 2020 [64]       |                                                                               |                                                                                             |                                                                                            |                                                                          | +                                   |                                                      |                                                        |
| Narang, 05-2020 [37]           |                                                                               | +                                                                                           |                                                                                            |                                                                          |                                     |                                                      | +                                                      |
| Williams, 05-2020 [91]         | +                                                                             |                                                                                             |                                                                                            |                                                                          |                                     |                                                      |                                                        |
| Tomori, 05-2020 [79]           |                                                                               | +                                                                                           |                                                                                            |                                                                          |                                     |                                                      |                                                        |
| Pramana, 06-2020 [80]          | +                                                                             |                                                                                             |                                                                                            |                                                                          |                                     |                                                      |                                                        |
| TrapaniJúnior, 06-2020 [26]    |                                                                               |                                                                                             |                                                                                            |                                                                          | +                                   |                                                      |                                                        |
| Trevisanuto, 06-2020 [62]      |                                                                               | +                                                                                           |                                                                                            |                                                                          |                                     |                                                      | +                                                      |
| Lavizzari, 06-2020 [57]        | +                                                                             |                                                                                             | +                                                                                          |                                                                          |                                     |                                                      |                                                        |
| Ashokka, 07-2020 [38]          |                                                                               |                                                                                             |                                                                                            |                                                                          | +                                   |                                                      |                                                        |
| Choi, 08-2020 [81]             | +                                                                             |                                                                                             |                                                                                            |                                                                          |                                     |                                                      |                                                        |
| Davanzo, 08-2020 [71]          |                                                                               | +                                                                                           |                                                                                            | +                                                                        |                                     |                                                      |                                                        |
| Mascarenhas, 08-2020 [27]      |                                                                               |                                                                                             |                                                                                            |                                                                          | +                                   |                                                      |                                                        |

|                                  |   |   |   |   |   |
|----------------------------------|---|---|---|---|---|
| NgYPM, 09-2020 [82]              |   | + |   |   | + |
| Genoni, 09-2020 [83]             |   | + |   |   |   |
| Czeresnia, 09-2020 [28]          |   | + |   |   |   |
| Krupa, 09-2020 [51]              |   | + |   |   |   |
| Góes, 10-2020 [29]               |   |   |   |   | + |
| Dimopoulou, 11-2020 [84]         | + |   | + |   |   |
| Yeo, 11-2020 [95]                |   |   | + |   | + |
| Barrero-Castillero, 12-2020 [75] |   | + |   |   |   |
| VuHoang, 12-2020 [105]           |   |   |   |   | + |
| Haiek, 01-2021 [72]              | + |   |   |   |   |
| Kotlar, 01-2021 [61]             |   | + |   |   |   |
| Spatz, 02-2021 [85]              | + |   |   | + | + |
| Bartick, 03-2021 [86]            | + |   |   |   | + |
| vanVeenendaal, 03-2021 [67]      | + |   |   |   |   |
| Olonan-Jusi, 03-2021 [92]        |   |   |   |   | + |
| Yeo, 04-2021 [73]                |   | + | + |   | + |
| Pountoukidou, 04-2021 [76]       |   | + |   |   | + |
| Poon, 04-2020 [36]               |   |   | + |   |   |
| ShahbaziSighaldehy, 06-2020 [65] |   |   | + |   |   |
| Australia                        |   |   |   |   |   |
| Gribble, 11-2020 [89]            |   | + |   | + | + |
| Vogel, 12-2020 [42]              |   | + |   | + |   |
| Brazil                           |   |   |   |   |   |

|                               |  |   |   |   |   |   |   |   |   |
|-------------------------------|--|---|---|---|---|---|---|---|---|
| deCarvalho, 05-2020 [70]      |  |   |   |   |   | + |   |   |   |
| Stofel, 08-2020 [53]          |  | + |   |   |   |   |   |   |   |
| deOliveira, 02-2021 [30]      |  |   |   | + |   |   | + |   | + |
| Cardoso, 02-2021 [31]         |  |   |   |   |   |   | + |   |   |
| Gonçalves-Ferri, 03-2021 [94] |  |   |   |   | + |   | + |   | + |
| Egypt                         |  |   |   |   |   |   |   |   |   |
| Mostafa, 08-2020 [68]         |  | + |   |   |   |   |   |   |   |
| India                         |  |   |   |   |   |   |   |   |   |
| Chawla, 06-2020 [63]          |  |   |   |   |   |   | + |   |   |
| Sharma, 08-2020 [33]          |  | + |   |   |   |   |   |   |   |
| Italy                         |  |   |   |   |   |   |   |   |   |
| Giusti, 04-2021 [44]          |  | + |   |   |   | + |   |   |   |
| Cavicchiolo, 04-2021 [59]     |  |   | + |   |   |   |   |   |   |
| Japan                         |  |   |   |   |   |   |   |   |   |
| Hosono, 04-2021 [93]          |  |   |   |   |   |   | + |   |   |
| Nigeria                       |  |   |   |   |   |   |   |   |   |
| Ezenwa, 05-2020 [90]          |  | + |   |   |   | + |   |   |   |
| Poland                        |  |   |   |   |   |   |   |   |   |
| Kalinka, 01-2021 [46]         |  |   |   |   |   |   |   |   | + |
| Wszolek, 04-2021 [55]         |  |   |   |   |   |   | + |   |   |
| Spain                         |  |   |   |   |   |   |   |   |   |
| López, 06-2020 [56]           |  | + |   | + |   |   |   |   | + |
| Montes, 07-2020 [77]          |  | + |   |   |   |   |   | + |   |
| LalagunaMallada, 07-2020 [88] |  | + |   |   |   |   |   | + |   |

| United Kingdom              |   |   |   |
|-----------------------------|---|---|---|
| Ross-Davie, 03-2021<br>[49] | + | + | + |
| USA                         |   |   |   |
| Amatya, 05-2020 [66]        |   |   | + |
| Harriel, 08-2020 [87]       |   | + |   |
| Boelig, 10-2020 [50]        |   |   | + |
| Flannery, 04-2021 [74]      |   | + |   |

<sup>1</sup> Skin to skin contact.
