# Supplementary material for: Protecting Breastfeeding during the COVID-19 Pandemic: A Scoping Review of Perinatal Care Recommendations in the Context of Maternal and Child Well-Being
Source: MDPI journal article supplement (doi:10.3390/ijerph19063347), 2022-03-11
Supplement: s1 [file s1]

**Supplementary Table S3.** Recommendations concerning the mode of delivery and companions on the labor for mothers with confirmed and/or suspected COVID-19.

| Author and date of publication | Mode of delivery determined by obstetric indications | CS for severely ill patients | VD is preferred/ no contraindication to VD | Postpone/ delay delivery (if maternal and fetal conditions allow it) | COVID-19 is not an indication for preterm delivery | Use a mask throughout labor (mother) | Water births are contraindicated | Availability of support/companions during the labor | Limited/resstricted visitation on labor and delivery | Screen visitors on the labor and delivery unit | Use of a mask by companions | Use of hands wash by companions | Support via video |
|--------------------------------|------------------------------------------------------|------------------------------|--------------------------------------------|----------------------------------------------------------------------|----------------------------------------------------|--------------------------------------|----------------------------------|-----------------------------------------------------|------------------------------------------------------|------------------------------------------------|-----------------------------|---------------------------------|-------------------|
| Non-country specific           |                                                      |                              |                                            |                                                                      |                                                    |                                      |                                  |                                                     |                                                      |                                                |                             |                                 |                   |
| Liang, 03-2020 [99]            | +                                                    |                              |                                            |                                                                      |                                                    |                                      |                                  |                                                     |                                                      |                                                |                             |                                 |                   |
| Poon, 04-2020 [36]             | +                                                    | +                            |                                            |                                                                      |                                                    |                                      |                                  |                                                     |                                                      |                                                |                             |                                 |                   |
| Stephens, 04-2020 [58]         | +                                                    |                              |                                            |                                                                      |                                                    |                                      |                                  | +                                                   | +                                                    | +                                              |                             |                                 |                   |
| Asadi, 04-2020                 | +                                                    | +                            |                                            |                                                                      |                                                    |                                      |                                  |                                                     |                                                      |                                                |                             |                                 |                   |
| Donders, 04-2020 [24]          | +                                                    |                              | +                                          |                                                                      |                                                    |                                      |                                  | +                                                   | +                                                    |                                                |                             |                                 |                   |
| Narang, 05-2020 [37]           | +                                                    | +                            |                                            |                                                                      |                                                    |                                      |                                  | +                                                   | +                                                    | +                                              |                             |                                 |                   |
| Abdollahpour, 05-2020 [25]     |                                                      | +                            | +                                          |                                                                      |                                                    |                                      |                                  | +                                                   | +                                                    |                                                |                             |                                 |                   |

|                                       |   |   |   |   |   |   |   |   |   |   |   |   |   |   |   |   |
|---------------------------------------|---|---|---|---|---|---|---|---|---|---|---|---|---|---|---|---|
| TrapaniJúnior<br>06-2020<br>[26]      |   | + |   | + |   | + |   |   | + |   | + |   |   | + |   | + |
| Trevisanuto<br>06-2020<br>[62]        | + |   |   |   |   |   |   |   |   |   |   |   |   |   |   |   |
| Lavizzari<br>06-2020<br>[57]          | + |   |   |   |   |   |   |   | + |   | + |   | + |   |   |   |
| Ashokka<br>07-2020<br>[38]            | + |   | + |   |   |   |   |   |   |   |   |   |   |   |   |   |
| Goyal<br>07-2020<br>[39]              | + |   | + |   |   |   |   |   | + |   | + |   | + |   | + | + |
| Api<br>07-2020<br>[52]                | + |   |   |   |   |   | + |   |   |   |   |   |   |   |   |   |
| Ryan 08-2020 [102]                    | + |   |   |   |   |   |   |   | + |   |   |   |   |   |   |   |
| Mascarenhas<br>08-2020 [27]           | + |   | + |   | + |   |   | + |   | + |   | + |   | + |   | + |
| Czeresnia<br>09-2020<br>[28]          |   |   |   |   | + |   | + |   |   | + |   |   |   |   |   |   |
| Krupa 09-2020 [51]                    | + |   |   |   |   |   | + |   |   | + |   |   |   |   |   |   |
| Góes 10-2020 [29]                     | + |   |   |   | + |   |   |   | + |   |   |   |   |   |   |   |
| Barrero-Castillero<br>12-2021<br>[75] | + |   |   |   |   |   |   |   |   |   |   |   |   |   |   |   |
| Kotlar<br>01-2021<br>[61]             | + |   |   |   |   |   |   |   | + |   | + |   | + |   |   |   |



|                                |   |   |             |
|--------------------------------|---|---|-------------|
| Singh<br>11-2020<br>[34]       | + | + | +           |
| Cavicchiolo<br>04-2021<br>[59] | + |   | + +         |
| Giusti<br>04-2021<br>[44]      | + | + | + + +       |
| Nigeria                        |   |   |             |
| Okunade<br>07-2020<br>[45]     | + | + | + +         |
| Poland                         |   |   |             |
| Kalinka<br>01-2021<br>[46]     | + | + | + + + +     |
| Wszolek<br>04-2021<br>[55]     | + |   | + + + +     |
| Russia                         |   |   |             |
| Ignatko<br>05-2020<br>[47]     | + | + | + + + + + + |
| Saudi Arabia                   |   |   |             |
| Faden<br>08-2020<br>[35]       | + | + | +           |
| Spain                          |   |   |             |
| López<br>06-2020<br>[56]       | + |   | + + + +     |
| Turkey                         |   |   |             |
| Erdeve                         | + | + |             |
