# Supplementary material for: Protecting Breastfeeding during the COVID-19 Pandemic: A Scoping Review of Perinatal Care Recommendations in the Context of Maternal and Child Well-Being
Source: MDPI journal article supplement (doi:10.3390/ijerph19063347), 2022-03-11
Supplement: s1 [file s1]

**Supplementary Table S6.** Recommendations concerning rooming-in management for mothers with confirmed and/or suspected COVID-19.

| Author and date of publication | Unconditional separation | Separation if COVID-19 diagnosed | Decision-based on the individual case | No separation, even if COVID-19 diagnosed | 2 meters distance when COVID-19 diagnosed | 2 meters distance independently from COVID-19 status |
|--------------------------------|--------------------------|----------------------------------|---------------------------------------|-------------------------------------------|-------------------------------------------|------------------------------------------------------|
| Non-country specific level     |                          |                                  |                                       |                                           |                                           |                                                      |
| Liang, 03-2020 [99]            |                          | +                                |                                       |                                           |                                           |                                                      |
| Poon, 04-2020 [36]             |                          | +                                |                                       |                                           | +                                         |                                                      |
| CalilVMLT, 04-2020 [64]        |                          |                                  |                                       | +                                         |                                           | +                                                    |
| Asadi, 04-2020 [41]            |                          | +                                |                                       |                                           |                                           |                                                      |
| Narang, 05-2020 [37]           |                          |                                  |                                       | +                                         |                                           |                                                      |
| Williams, 05-2020 [91]         |                          |                                  |                                       | +                                         |                                           |                                                      |
| Tomori, 05-2020 [79]           |                          |                                  |                                       | +                                         |                                           |                                                      |
| Abdollahpour, 05-2020 [25]     |                          |                                  | +                                     |                                           |                                           |                                                      |
| Pramana, 06-2020 [80]          |                          | +                                |                                       |                                           |                                           |                                                      |
| TrapaniJúnior, 06-2020 [26]    |                          |                                  |                                       | +                                         |                                           |                                                      |
| Trevisanuto, 06-2020 [62]      |                          |                                  |                                       | +                                         |                                           |                                                      |
| Lavizzari, 06-2020 [57]        |                          |                                  |                                       | +                                         |                                           |                                                      |
| Api, 07-2020 [52]              |                          |                                  |                                       | +                                         |                                           |                                                      |
| Choi, 08-2020 [81]             |                          |                                  |                                       | +                                         |                                           |                                                      |
| Mascarenhas, 08-2020 [27]      |                          |                                  | +                                     |                                           |                                           |                                                      |
| NgYPM, 09-2020 [82]            |                          |                                  |                                       | +                                         |                                           |                                                      |
| Czeresnia, 09-2020 [28]        |                          | +                                |                                       |                                           |                                           |                                                      |
| Krupa, 09-2020 [51]            |                          |                                  |                                       | +                                         |                                           |                                                      |
| Góes, 10-2020 [29]             |                          | +                                |                                       |                                           |                                           | +                                                    |
| Dimopoulou, 11-2020 [84]       |                          |                                  |                                       | +                                         |                                           |                                                      |
| Yeo, 11-2020 [95]              |                          |                                  | +                                     |                                           |                                           | +                                                    |
| Haiek, 01-2021 [72]            |                          |                                  |                                       | +                                         |                                           |                                                      |
| Kotlar, 01-2021 [61]           |                          |                                  |                                       | +                                         |                                           |                                                      |
| Spatz, 02-2021 [96]            |                          |                                  |                                       | +                                         |                                           |                                                      |
| Olonan-Jusi, 03-2021 [92]      |                          |                                  | +                                     |                                           |                                           |                                                      |

|                             |   |   |   |
|-----------------------------|---|---|---|
| Bartick, 03-2021 [86]       |   |   | + |
| vanVeenendaal, 03-2021 [67] |   |   | + |
| Yeo, 04-2021 [73]           |   | + | + |
| Pountoukidou, 04-2021 [76]  |   | + |   |
| Australia                   |   |   |   |
| Gribble, 11-2020 [89]       |   |   | + |
| Vogel, 12-2020 [42]         |   |   | + |
| Brazil                      |   |   |   |
| deCarvalho, 05-2020 [70]    |   |   | + |
| deOliveira, 02-2021 [30]    |   |   | + |
| Cardoso, 02-2021 [31]       |   | + | + |
| China                       |   |   |   |
| Chen, 03-2020 [32]          | + |   |   |
| Egypt                       |   |   |   |
| Mostafa, 08-2020 [68]       |   | + | + |
| India                       |   |   |   |
| Chawla, 06-2020 [63]        |   | + | + |
| Sachdeva, 08-2020 [69]      |   |   | + |
| Sharma, 08-2020 [33]        |   |   | + |
| Italy                       |   |   |   |
| Davanzo, 03-2020 [101]      |   | + |   |
| Franchi, 03-2020 [43]       |   | + |   |
| Moro, 11-2020 [100]         |   | + |   |
| Ronchi, 12-2020 [97]        |   |   | + |
| Giusti, 04-2021 [44]        |   |   | + |
| Nigeria                     |   |   |   |
| Ezenwa, 05-2020 [90]        |   | + |   |
| Poland                      |   |   |   |
| Kalinka, 01-2021 [46]       |   |   | + |
| Wszolek, 04-2021[55]        |   |   | + |
| Russia                      |   |   |   |
| Ignatko, 05-2020 [47]       | + |   |   |
| Saudi Arabia                |   |   |   |
| Faden, 08-2020 [35]         |   | + |   |

|                               |   |   |
|-------------------------------|---|---|
| Spain                         |   |   |
| López, 06-2020 [56]           |   | + |
| Montes, 07-2020 [77]          |   | + |
| LalagunaMallada, 07-2020 [88] | + |   |
| Turkey                        |   |   |
| Erdeve, 06-2020 [48]          | + |   |
| UK                            |   |   |
| Ross-Davie, 03-2021 [49]      |   | + |
| USA                           |   |   |
| Boelig, 05-2020 [60]          | + |   |
| Amatya, 05-2020 [66]          | + |   |
| Harriel, 08-2020 [87]         | + |   |
| Perrine, 11-2020 [98]         |   | + |
