# Supplementary material for: Protecting Breastfeeding during the COVID-19 Pandemic: A Scoping Review of Perinatal Care Recommendations in the Context of Maternal and Child Well-Being
Source: MDPI journal article supplement (doi:10.3390/ijerph19063347), 2022-03-11
Supplement: s1 [file s1]

**Supplementary Table S4.** Recommendations concerning visitor policies on maternity ward for mothers with confirmed and/or suspected COVID-19.

| Author and date of publication   | Screening visitors | Limit visits - no detailed recommendations | Limit the number of visitors to one | Visitors of a particular age only | Family members only | PPE <sup>1</sup> required | A healthy companion when the mother is severely ill | No visitors | Using video and teleconferences |
|----------------------------------|--------------------|--------------------------------------------|-------------------------------------|-----------------------------------|---------------------|---------------------------|-----------------------------------------------------|-------------|---------------------------------|
| Global level                     |                    |                                            |                                     |                                   |                     |                           |                                                     |             |                                 |
| Poon, 04-2020 [36]               |                    | +                                          |                                     |                                   |                     |                           |                                                     |             |                                 |
| CalilVMLT, 04-2020 [64]          |                    |                                            | +                                   |                                   |                     |                           |                                                     |             |                                 |
| Stephens, 04-2020 [58]           | +                  |                                            | +                                   |                                   |                     |                           |                                                     | +           |                                 |
| Asadi, 04-2020 [41]              |                    | +                                          |                                     |                                   |                     |                           |                                                     |             |                                 |
| Narang, 05-2020 [37]             |                    | +                                          |                                     |                                   |                     |                           |                                                     |             |                                 |
| Abdollahpour, 05-2020 [25]       |                    | +                                          |                                     |                                   |                     |                           |                                                     |             |                                 |
| TrapaniJunior, 06-2020 [26]      | +                  |                                            | +                                   | +                                 | +                   | +                         |                                                     |             |                                 |
| ShahbaziSighaldehy, 06-2020 [65] | +                  |                                            | +                                   |                                   |                     | +                         |                                                     |             |                                 |
| Trevisanuto, 06-2020 [62]        |                    |                                            | +                                   |                                   | +                   |                           |                                                     |             |                                 |
| Lavizzari, 06-2020 [57]          |                    | +                                          |                                     |                                   |                     |                           |                                                     | +           |                                 |
| Montes, 07-2020 [77]             |                    | +                                          |                                     |                                   |                     |                           |                                                     |             |                                 |
| Api, 07-2020 [52]                |                    | +                                          |                                     |                                   |                     |                           | +                                                   |             |                                 |
| Czeresnia, 09-2020 [28]          |                    | +                                          |                                     |                                   |                     | +                         |                                                     |             |                                 |
| Krupa, 09-2020 [51]              |                    |                                            |                                     |                                   | +                   |                           | +                                                   |             |                                 |
| Góes, 10-2020 [29]               | +                  |                                            |                                     | +                                 | +                   | +                         |                                                     |             |                                 |
| Haiek, 01-2021 [72]              |                    |                                            |                                     |                                   |                     |                           |                                                     |             | +                               |
| vanVeenendaal, 03-2021 [67]      | +                  |                                            |                                     |                                   | +                   | +                         |                                                     |             | +                               |

|                          |  |   |  |  |  |  |  |   |   |
|--------------------------|--|---|--|--|--|--|--|---|---|
| Yeo, 04-2021 [73]        |  | + |  |  |  |  |  |   | + |
| Devarajan, 05-2021 [40]  |  |   |  |  |  |  |  |   | + |
| Brazil                   |  |   |  |  |  |  |  |   |   |
| deCarvalho, 05-2020 [70] |  |   |  |  |  |  |  |   | + |
| deOliveira, 02-2021 [30] |  |   |  |  |  |  |  |   | + |
| Cardoso, 02-2021 [31]    |  |   |  |  |  |  |  |   | + |
| China                    |  |   |  |  |  |  |  |   |   |
| Chen, 03-2020 [32]       |  |   |  |  |  |  |  |   | + |
| Egypt                    |  |   |  |  |  |  |  |   |   |
| Mostafa, 08-2020 [68]    |  |   |  |  |  |  |  | + | + |
| India                    |  |   |  |  |  |  |  |   |   |
| Chawla, 06-2020 [63]     |  | + |  |  |  |  |  | + |   |
| Sachdeva, 08-2020 [69]   |  |   |  |  |  |  |  | + | + |
| Italy                    |  |   |  |  |  |  |  |   |   |
| Davanzo, 03-2020 [101]   |  |   |  |  |  |  |  |   | + |
| Franchi, 03-2020 [43]    |  |   |  |  |  |  |  |   | + |
| Poland                   |  |   |  |  |  |  |  |   |   |
| Wszolek, 04-2021 [55]    |  |   |  |  |  |  |  |   | + |
| Saudi Arabia             |  |   |  |  |  |  |  |   |   |
| Faden, 08-2020 [35]      |  |   |  |  |  |  |  |   | + |
| Spain                    |  |   |  |  |  |  |  |   |   |
| López, 06-2020 [56]      |  |   |  |  |  |  |  |   | + |
| Russia                   |  |   |  |  |  |  |  |   |   |
| Ignatko, 05-2020 [47]    |  |   |  |  |  |  |  |   | + |
| Turkey                   |  |   |  |  |  |  |  |   |   |
| Erdeve, 06-2020 [48]     |  |   |  |  |  |  |  |   | + |
| UK                       |  |   |  |  |  |  |  |   |   |
| Ross-Davie, 03-2021 [49] |  |   |  |  |  |  |  |   | + |
| USA                      |  |   |  |  |  |  |  |   |   |
| Boelig, 05-2020 [60]     |  |   |  |  |  |  |  |   | + |
| Amatya, 05-2020 [66]     |  |   |  |  |  |  |  |   | + |
| Boelig, 10-2020 [50]     |  | + |  |  |  |  |  |   | + |

<sup>1</sup> PPE - personal protective equipment.
