# Supplementary material for: Protecting Breastfeeding during the COVID-19 Pandemic: A Scoping Review of Perinatal Care Recommendations in the Context of Maternal and Child Well-Being
Source: MDPI journal article supplement (doi:10.3390/ijerph19063347), 2022-03-11
Supplement: s1 [file s1]

**Supplementary Table S2.** List of studies included.

| <b>Autor(s)</b>                                                                                                                                                                                                                                                                                                                                                                             | <b>publication date</b> | <b>Title</b>                                                                                                                                                              | <b>country/global level</b> | <b>type of publication</b> |
|---------------------------------------------------------------------------------------------------------------------------------------------------------------------------------------------------------------------------------------------------------------------------------------------------------------------------------------------------------------------------------------------|-------------------------|---------------------------------------------------------------------------------------------------------------------------------------------------------------------------|-----------------------------|----------------------------|
| Chen, D.; Yang, H.; Cao, Y.; Cheng, W.; Duan, T.; Fan, C.; Fan, S.; Feng, L.; Gao, Y.; He, F.; He, J.; Hu, Y.; Jiang, Y.; Li, Y.; Li, J.; Li, X.; Lin, K.; Liu, C.; Liu, J.; Liu, X.; Pan, X.; Pang, Q.; Pu, M.; Qi, H.; Shi, C.; Sun, Y.; Sun, J.; Wang, X.; Wang, Y.; Wang, Z.; Wang, C.; Wu, S.; Xin, H.; Yan, J.; Zhao, Y.; Zheng, J.; Zhou, Y.; Zou, L.; Zeng, Y.; Zhang, Y.; Guan, X. | 03-2020                 | Expert consensus for managing pregnant women and neonates born to mothers with suspected or confirmed novel coronavirus (COVID-19) infection                              | China, USA                  | review of recommendations  |
| Davanzo, R.; Merewood, A.; Manzoni, P.                                                                                                                                                                                                                                                                                                                                                      | 03-2020                 | Breastfeeding and coronavirus disease-2019: Ad interim indications of the Italian Society of Neonatology endorsed by the Union of European Neonatal & Perinatal Societies | Italy                       | review of recommendations  |
| Franchi, M.; Bosco, M.; Garzon, S.; Laganà, A.S.; Cromi, A.; Barbieri, B.; Raffaelli, R.; Tacconelli, E.; Scambia, G.; Ghezzi, F.                                                                                                                                                                                                                                                           | 03-2020                 | Management of obstetrics and gynaecological patients with COVID-19                                                                                                        | Italy                       | review of recommendations  |
| Liang, H.; Acharya, G.                                                                                                                                                                                                                                                                                                                                                                      | 03-2020                 | Novel corona virus disease (COVID-19) in pregnancy: What clinical recommendations to follow?                                                                              | global spectrum             | a query of research        |
| Asadi, L.; Tabatabaei, R.S.; Safinejad, H.; Mohammadi, M.                                                                                                                                                                                                                                                                                                                                   | 04-2020                 | New corona virus (COVID-19) management in pregnancy and childbirth                                                                                                        | global spectrum             | systematic review          |
| Calil VMLT; Krebs VLJ; Carvalho WB                                                                                                                                                                                                                                                                                                                                                          | 04-2020                 | Guidance on breastfeeding during the Covid-19 pandemic.                                                                                                                   | global spectrum             | a query of research        |
| Donders, F.; Lonnée-Hoffmann, R.; Tsiakalos, A.; Mendling, W.; De Oliveira, J.M.; Judlin, P.; Xue, F.; Donders, G.G.G.                                                                                                                                                                                                                                                                      | 04-2020                 | ISIDOG recommendations concerning COVID-19 and pregnancy                                                                                                                  | global spectrum             | a query of research        |
| Poon LC; Yang H; Kapur A; Melamed N; Dao B; Divakar H; McIntyre HD; Kihara AB; Ayres-de-Campos D; Ferrazzi EM; Di Renzo GC; Hod M                                                                                                                                                                                                                                                           | 04-2020                 | Global interim guidance on coronavirus disease 2019 (COVID-19) during pregnancy and puerperium from                                                                       | global spectrum             | a query of research        |

|                                                                                                                                                                                                                                                                                                                                                            |         |                                                                                                                            |                 |                           |
|------------------------------------------------------------------------------------------------------------------------------------------------------------------------------------------------------------------------------------------------------------------------------------------------------------------------------------------------------------|---------|----------------------------------------------------------------------------------------------------------------------------|-----------------|---------------------------|
|                                                                                                                                                                                                                                                                                                                                                            |         | FIGO and allied partners: Information for healthcare professionals.                                                        |                 |                           |
| Stephens, A.J.; Barton, J.R.; Bentum, N.-A.A.; Blackwell, S.C.; Sibai, B.M.                                                                                                                                                                                                                                                                                | 04-2020 | General Guidelines in the Management of an Obstetrical Patient on the Labor and Delivery Unit during the COVID-19 Pandemic | global spectrum | a query of research       |
| WHO                                                                                                                                                                                                                                                                                                                                                        | 04-2020 | WHO Frequently Asked Questions : Breastfeeding and COVID-19 For health care workers.                                       | global spectrum | review of recommendations |
| Abdollahpour, S.; Khadivzadeh, T.                                                                                                                                                                                                                                                                                                                          | 05-2020 | Improving the quality of care in pregnancy and childbirth with coronavirus (COVID-19): a systematic review                 | global spectrum | systematic review         |
| Amatya, S.; Corr, T.E.; Gandhi, C.K.; Glass, K.M.; Kresch, M.J.; Mujsce, D.J.; Oji-Mmuo, C.N.; Mola, S.J.; Murray, Y.L.; Palmer, T.W.; Singh, M.; Fricchione, A.; Arnold, J.; Prentice, D.; Bridgeman, C.R.; Smith, B.M.; Gavigan, P.J.; Ericson, J.E.; Miller, J.R.; Pauli, J.M.; Williams, D.C.; McSherry, G.D.; Legro, R.S.; Iriana, S.M.; Kaiser, J.R. | 05-2020 | Management of newborns exposed to mothers with confirmed or suspected COVID-19                                             | USA             | a query of research       |
| BMJ                                                                                                                                                                                                                                                                                                                                                        | 05-2020 | Covid-19 and pregnancy.                                                                                                    | UK              | review of recommendations |
| Boelig, R.C.; Lambert, C.; Pena, J.A.; Stone, J.; Bernstein, P.S.; Berghella, V.                                                                                                                                                                                                                                                                           | 05-2020 | Labor and delivery guidance for COVID-19                                                                                   | USA             | review of recommendations |
| de Carvalho, W.B.; Gibelli, M.A.B.C.; Krebs, V.L.J.; Tragante, C.R.; Perondi, M.B.M.                                                                                                                                                                                                                                                                       | 05-2020 | Role of a neonatal intensive care unit during the COVID-19 pandemia: Recommendations from the neonatology discipline       | Brazil          | review of recommendations |
| Ezenwa, B.N.; Fajolu, I.B.; Akinajo, O.R.; Makwe, C.C.; Oluwole, A.A.; Akase, I.E.; Afolabi, B.B.; Ezeaka, V.C.                                                                                                                                                                                                                                            | 05-2020 | Management of covid-19: a practical guideline for maternal and newborn health care providers in Sub-Saharan Africa         | Nigeria         | a query of research       |
| Ignatko, I.V.; Strizhakov, A.N.; Timokhina, E.V.; Denisova, Y.V.                                                                                                                                                                                                                                                                                           | 05-2020 | Novel coronavirus infection (Covid-19): Guiding principles for obstetric care under pandemic conditions                    | Russia          | a query of research       |
| Narang K; Ibirogba ER; Elrefaei A; Trad ATA; Theiler R; Nomura R; Picone O; Kilby M; Escuriet R; Suy A; Carreras E; Tonni G; Ruano R                                                                                                                                                                                                                       | 05-2020 | SARS-CoV-2 in Pregnancy: A Comprehensive Summary of Current Guidelines.                                                    | global spectrum | review of recommendations |

|                                                                                                                                                                                                                                                                                                                                                                                                                      |         |                                                                                                                                                                                                                                   |                 |                             |
|----------------------------------------------------------------------------------------------------------------------------------------------------------------------------------------------------------------------------------------------------------------------------------------------------------------------------------------------------------------------------------------------------------------------|---------|-----------------------------------------------------------------------------------------------------------------------------------------------------------------------------------------------------------------------------------|-----------------|-----------------------------|
| Tomori C; Gribble K; Palmquist AEL; Ververs MT; Gross MS                                                                                                                                                                                                                                                                                                                                                             | 05-2020 | When separation is not the answer: Breastfeeding mothers and infants affected by COVID-19.                                                                                                                                        | global spectrum | a query of research         |
| Vivanti AJ; Deruelle P; Picone O; Guillaume S; Roze JC; Mulin B; Kochert F; De Beco I; Mahut S; Gantois A; Barasinski C; Petitprez K; Pauchet-Traversat AF; Droy A; Benachi A                                                                                                                                                                                                                                        | 05-2020 | Post-natal follow-up for women and neonates during the COVID-19 pandemic: French National Authority for Health recommendations.                                                                                                   | France          | review of recommendations   |
| Williams J; Namazova-Baranova L; Weber M; Vural M; Mestrovic J; Carrasco-Sanz A; Breda J; Berdzuli N; Pettoello-Mantovani M                                                                                                                                                                                                                                                                                          | 05-2020 | The Importance of Continuing Breastfeeding during Coronavirus Disease-2019: In Support of the World Health Organization Statement on Breastfeeding during the Pandemic.                                                           | global spectrum | a query of research         |
| Chawla D; Chirla D; Dalwai S; Deorari AK; Ganatra A; Gandhi A; Kabra NS; Kumar P; Mittal P; Parekh BJ; Sankar MJ; Singhal T; Sivanandan S; Tank P                                                                                                                                                                                                                                                                    | 06-2020 | Perinatal-Neonatal Management of COVID-19 Infection - Guidelines of the Federation of Obstetric and Gynaecological Societies of India (FOGSI), National Neonatology Forum of India (NNF), and Indian Academy of Pediatrics (IAP). | India           | rapid/living/scoping review |
| Erdeve, Ö.; Çetinkaya, M.; Baş, A.Y.; Narlı, N.; Duman, N.; Vural, M.; Koç, E.                                                                                                                                                                                                                                                                                                                                       | 06-2020 | The Turkish neonatal society proposal for the management of COVID-19 in the neonatal intensive care unit                                                                                                                          | Turkey          | a query of research         |
| Lavizzari, A.; Klingenberg, C.; Profit, J.; Zupancic, J.A.F.; Davis, A.S.; Mosca, F.; Molloy, E.J.; Roehr, C.C.; Bassler, D.; Burn-Murdoch, J.; Danhaive, O.; Davis, J.; Ferri, W.A.G.; Fuchs, H.; Ge, H.; Gupta, A.; Gupta, M.; Lang, A.; van Kaam, A.; Díaz, V.J.L.; Treviño-Pérez, R.; Helkey, D.; Tembulkar, S.; Mariani, G.L.; Naver, L.; Patel, A.; Shah, P.; Szczapa, T.; Vento, M.; Wellmann, S.; Zangen, S. | 06-2020 | International comparison of guidelines for managing neonates at the early phase of the SARS-CoV-2 pandemic                                                                                                                        | global spectrum | original paper              |
| López, M.; Gonce, A.; Meler, E.; Plaza, A.; Hernández, S.; Martínez-Portilla, R.J.; Cobo, T.; García, F.; Gómez Roig, M.D.; Gratacós, E.; Palacio, M.; Figueras, F.                                                                                                                                                                                                                                                  | 06-2020 | Coronavirus Disease 2019 in Pregnancy: A Clinical Management Protocol and Considerations for Practice                                                                                                                             | Spain           | a query of research         |
| Pramana, C.; Suwanto, J.; Sumarni, N.; Kumalasari, M.L.F.; Selasih Putri Isnawati, H.;                                                                                                                                                                                                                                                                                                                               | 06-2020 | Breastfeeding in postpartum women infected with COVID-19                                                                                                                                                                          | global spectrum | review of recommendations   |

|                                                                                                                                                                                                                                                                                                                                                                                                         |         |                                                                                                                                                                                                                                                |                 |                           |
|---------------------------------------------------------------------------------------------------------------------------------------------------------------------------------------------------------------------------------------------------------------------------------------------------------------------------------------------------------------------------------------------------------|---------|------------------------------------------------------------------------------------------------------------------------------------------------------------------------------------------------------------------------------------------------|-----------------|---------------------------|
| Supinganto, A.; Ernawati, K.; Sirait, L.I.; Staryo, N.; Nurhidayah; Dwiyo, K.                                                                                                                                                                                                                                                                                                                           |         |                                                                                                                                                                                                                                                |                 |                           |
| Shahbazi Sighaldehy, S.; Ebrahimi Kalan, M.                                                                                                                                                                                                                                                                                                                                                             | 06-2020 | Care of newborns born to mothers with COVID-19 infection; a review of existing evidence                                                                                                                                                        | global spectrum | a query of research       |
| Trapani Júnior, A.; Vanhoni, L.R.; Silveira, S.K.; Marcolin, A.C.                                                                                                                                                                                                                                                                                                                                       | 06-2020 | Childbirth, Puerperium and Abortion Care Protocol during the COVID-19 Pandemic                                                                                                                                                                 | global spectrum | a query of research       |
| Trevisanuto, D.; Weiner, G.; Lakshminrusimha, S.; Azzimonti, G.; Nsubuga, J.B.; Velaphi, S.; Seni, A.H.A.; Tylleskär, T.; Putoto, G.                                                                                                                                                                                                                                                                    | 06-2020 | Management of mothers and neonates in low resources setting during covid-19 pandemia                                                                                                                                                           | global spectrum | a query of research       |
| Api, O.; Sen, C.; Debska, M.; Saccone, G.; D'Antonio, F.; Volpe, N.; Yayla, M.; Esin, S.; Turan, S.; Kurjak, A.; Chervenak, F.                                                                                                                                                                                                                                                                          | 07-2020 | Clinical management of coronavirus disease 2019 (COVID-19) in pregnancy: Recommendations of WAPM-World Association of Perinatal Medicine                                                                                                       | global spectrum | a query of research       |
| Ashokka, B.; Loh, M.-H.; Tan, C.H.; Su, L.L.; Young, B.E.; Lye, D.C.; Biswas, A.; Illanes, S.E.; Choolani, M.                                                                                                                                                                                                                                                                                           | 07-2020 | Care of the pregnant woman with coronavirus disease 2019 in labor and delivery: anesthesia, emergency cesarean delivery, differential diagnosis in the acutely ill parturient, care of the newborn, and protection of the healthcare personnel | global spectrum | a query of research       |
| Goyal, M.; Singh, P.; Melana, N.                                                                                                                                                                                                                                                                                                                                                                        | 07-2020 | Review of care and management of pregnant women during COVID-19 pandemic                                                                                                                                                                       | global spectrum | a query of research       |
| Lalaguna Mallada P; Díaz-Gómez NM; Costa Romero M; San Feliciano Martín L; Gabarrell Guiu C                                                                                                                                                                                                                                                                                                             | 07-2020 | [The impact of Covid-19 pandemic on breastfeeding and birth care. The importance of recovering good practices.].                                                                                                                               | Spain           | a query of research       |
| Montes, M.T.; Herranz-Rubia, N.; Ferrero, A.; Flórez, A.; Quiroga, A.; Gómez, A.; Chinea, B.; Gómez, C.; Montaner, C.; Sánchez, N.; Rico, C.M.; Segovia, C.; Eiriz, D.; Carrillo, E.; Cañizares, E.M.; Chattas, G.; Mimón, I.I.; Guerra, I.M.; Del Río, L.; Martín, M.J.; Elena, M.O.; García, M.; Alcázar, M.; Martínez, P.; Sánchez, P.; De Miguel, R.; Cortés, R.; Massip, S.; Tato, S.; Jiménez, T. | 07-2020 | Neonatal nursing in the COVID-19 pandemic: can we improve the future?                                                                                                                                                                          | Spain           | review of recommendations |
| Okunade, K.S.; Makwe, C.C.; Akinajo, O.R.; Owie, E.; Ohazurike, E.O.; Babah, O.A.; Okunowo, A.A.;                                                                                                                                                                                                                                                                                                       | 07-2020 | Good clinical practice advice for the management of pregnant women with suspected or confirmed COVID-19 in Nigeria                                                                                                                             | Nigeria         | review of recommendations |

|                                                                                                                                                                                                     |         |                                                                                                                                                      |                 |                             |
|-----------------------------------------------------------------------------------------------------------------------------------------------------------------------------------------------------|---------|------------------------------------------------------------------------------------------------------------------------------------------------------|-----------------|-----------------------------|
| Omisakin, S.I.; Oluwole, A.A.; Olamijulo, J.A.; Adegbola, O.; Anorlu, R.I.; Afolabi, B.B.                                                                                                           |         |                                                                                                                                                      |                 |                             |
| Choi KR; Records K; Low LK; Alhusen JL; Kenner C; Bloch JR; Premji SS; Hannan J; Anderson CM; Yeo S; Cynthia Logsdon M                                                                              | 08-2020 | Promotion of Maternal-Infant Mental Health and Trauma-Informed Care During the COVID-19 Pandemic.                                                    | global spectrum | review of recommendations   |
| Davanzo, R.; Moro, G.; Sandri, F.; Agosti, M.; Moretti, C.; Mosca, F.                                                                                                                               | 08-2020 | Skin-to-Skin Contact at Birth in the COVID-19 Era: In Need of Help!                                                                                  | global spectrum | a query of research         |
| Faden YA; Alghilan NA; Alawami SH; Alsulmi ES; Alsum HA; Katib YA; Sabr YS; Tahir FH; Bondagji NS                                                                                                   | 08-2020 | Saudi Society of Maternal-Fetal Medicine guidance on pregnancy and coronavirus disease 2019.                                                         | Saudi Arabia    | a query of research         |
| Harriel, K.L.; Nolt, D.; Moore, S.; Kressly, S.; Bernstein, H.H.                                                                                                                                    | 08-2020 | Management of neonates after postpartum discharge and all children in the ambulatory setting during the coronavirus disease 2019 (COVID-19) pandemic | USA             | a query of research         |
| Mascarenhas, V.H.A.; Caroci-Becker, A.; Venâncio, K.C.M.P.; Baraldi, N.G.; Durkin, A.C.; Riesco, M.L.G.                                                                                             | 08-2020 | Care recommendations for parturient and postpartum women and newborns during the covid-19 pandemic: A scoping review                                 | global spectrum | rapid/living/scoping review |
| Mostafa, A. S.; Abdalbaky, A.; Fouda, E. M.; Shaaban, H. H.; Elnady, H. G.; Hassab-Allah, M.; Rashad, M. M.; El Attar, M. M.; Alfishawy, M.; Hussien, S. M.; Hamed, T.; Hamed, D. H.; Sarhan, D. T. | 08-2020 | Practical approach to COVID-19: an Egyptian pediatric consensus                                                                                      | Egypt           | review of recommendations   |
| Ryan GA; Purandare NC; McAuliffe FM; Hod M; Purandare CN                                                                                                                                            | 08-2020 | Clinical update on COVID-19 in pregnancy: A review article.                                                                                          | global spectrum | a query of research         |
| Sachdeva RC; Jain S; Mukherjee S; Singh J                                                                                                                                                           | 08-2020 | Ensuring Exclusive Human Milk Diet for All Babies in COVID-19 Times.                                                                                 | India           | a query of research         |
| Sharma, J.B.; Sharma, E.; Sharma, S.; Singh, J.                                                                                                                                                     | 08-2020 | Recommendations for prenatal, intrapartum, and postpartum care during COVID-19 pandemic in India                                                     | India           | a query of research         |
| Stofel, N.S.; Christinelli, D.; Silva, R.C.S.; Salim, N.R.; Beleza, A.C.S.; Bussadori, J.C.C.                                                                                                       | 08-2020 | Perinatal care in the COVID-19 pandemic: Analysis of Brazilian guidelines and protocols                                                              | Brazil          | review of recommendations   |
| Czeresnia RM; Trad ATA; Britto ISW; Negrini R; Nomura ML; Pires P; Costa FDS; Nomura RMY; Ruano R                                                                                                   | 09-2020 | SARS-CoV-2 and Pregnancy: A Review of the Facts.                                                                                                     | global spectrum | a query of research         |

|                                                                                                                                                                                                                                                            |         |                                                                                                                                                             |                 |                             |
|------------------------------------------------------------------------------------------------------------------------------------------------------------------------------------------------------------------------------------------------------------|---------|-------------------------------------------------------------------------------------------------------------------------------------------------------------|-----------------|-----------------------------|
| Genoni G; Conio A; Binotti M; Manzoni P; Castagno M; Rabbone I; Monzani A                                                                                                                                                                                  | 09-2020 | Management and Nutrition of Neonates during the COVID-19 Pandemic: A Review of the Existing Guidelines and Recommendations.                                 | global spectrum | rapid/living/scoping review |
| Krupa, A.; Schmidt, M.; Zborowska, K.; Jorg, D.; Czajkowska, M.; Skrzypulec-Plinta, V.                                                                                                                                                                     | 09-2020 | Impact of COVID-19 on pregnancy and delivery - Current knowledge                                                                                            | global spectrum | a query of research         |
| Mocelin, H.J.S.; Primo, C.C.; Laignier, M.R.                                                                                                                                                                                                               | 09-2020 | Overview on the recommendations for breastfeeding and COVID-19                                                                                              | global spectrum | rapid/living/scoping review |
| Ng YPM; Low YF; Goh XL; Fok D; Amin Z                                                                                                                                                                                                                      | 09-2020 | Breastfeeding in COVID-19: A Pragmatic Approach.                                                                                                            | global spectrum | a query of research         |
| Boelig, R.C.; Manuck, T.; Oliver, E.A.; Di Mascio, D.; Saccone, G.; Bellussi, F.; Berghella, V.                                                                                                                                                            | 10-2020 | Obstetric protocols in the setting of a pandemic                                                                                                            | USA             | a query of research         |
| Góes, F.G.B.; Dos Santos, A.S.T.; Lucchese, I.; da Silva, L.J.; da Silva, L.F.; Silva, M.A.                                                                                                                                                                | 10-2020 | Best practices in newborn care in COVID-19 times: An integrative review                                                                                     | global spectrum | systematic review           |
| Benski C; Di Filippo D; Taraschi G; Reich MR                                                                                                                                                                                                               | 11-2020 | Guidelines for Pregnancy Management During the COVID-19 Pandemic: A Public Health Conundrum.                                                                | global spectrum | review of recommendations   |
| Dimopoulou D; Triantafyllidou P; Daskalaki A; Syridou G; Papaevangelou V                                                                                                                                                                                   | 11-2020 | Breastfeeding during the novel coronavirus (COVID-19) pandemic: guidelines and challenges.                                                                  | global spectrum | a query of research         |
| Gribble K; Marinelli KA; Tomori C; Gross MS                                                                                                                                                                                                                | 11-2020 | Implications of the COVID-19 Pandemic Response for Breastfeeding, Maternal Caregiving Capacity and Infant Mental Health.                                    | Australia       | review of recommendations   |
| Moro GE; Bertino E                                                                                                                                                                                                                                         | 11-2020 | Breastfeeding, Human Milk Collection and Containers, and Human Milk Banking: Hot Topics During the COVID-19 Pandemic.                                       | Italy           | a query of research         |
| Perrine CG; Chiang KV; Anstey EH; Grossniklaus DA; Boundy EO; Sauber-Schatz EK; Nelson JM                                                                                                                                                                  | 11-2020 | Implementation of Hospital Practices Supportive of Breastfeeding in the Context of COVID-19 - United States, July 15-August 20, 2020.                       | USA             | original paper              |
| Singh V; Trigunait P; Majumdar S; Ganeshan R; Sahu R                                                                                                                                                                                                       | 11-2020 | Managing pregnancy in COVID-19 pandemic: A review article.                                                                                                  | Italy           | a query of research         |
| Yeo, K.T.; Oei, J.L.; De Luca, D.; Schmölder, G.M.; Guaran, R.; Palasanthiran, P.; Kumar, K.; Buonocore, G.; Cheong, J.; Owen, L.S.; Kusuda, S.; James, J.; Lim, G.; Sharma, A.; Uthaya, S.; Gale, C.; Whittaker, E.; Battersby, C.; Modi, N.; Norman, M.; | 11-2020 | Review of guidelines and recommendations from 17 countries highlights the challenges that clinicians face caring for neonates born to mothers with COVID-19 | global spectrum | a query of research         |

|                                                                                                                                                                                                                                                                                     |         |                                                                                                                                                    |                    |                                |  |
|-------------------------------------------------------------------------------------------------------------------------------------------------------------------------------------------------------------------------------------------------------------------------------------|---------|----------------------------------------------------------------------------------------------------------------------------------------------------|--------------------|--------------------------------|--|
| Naver, L.; Giannoni, E.; Diambomba, Y.; Shah, P.S.;<br>Gagliardi, L.; Harrison, M.; Pillay, S.; Alburaey, A.;<br>Yuan, Y.; Zhang, H.                                                                                                                                                |         |                                                                                                                                                    |                    |                                |  |
| Barrero-Castillero A; Beam KS; Bernardini LB;<br>Ramos EGC; Davenport PE; Duncan AR; Fraiman YS;<br>Frazer LC; Healy H; Herzberg EM; Keyes ML;<br>Leeman KT; Leone K; Levin JC; Lin M; Raju RM;<br>Sullivan A                                                                       | 12-2020 | COVID-19: neonatal-perinatal perspectives.                                                                                                         | global<br>spectrum | a query of research            |  |
| Ronchi A; Pietrasanta C; Zavattoni M; Saruggia M;<br>Schena F; Sinelli MT; Agosti M; Tzialla C; Varsalone<br>FF; Testa L; Ballerini C; Ferrari S; Mangili G; Ventura<br>ML; Perniciaro S; Spada E; Lunghi G; Piralla A;<br>Baldanti F; Mosca F; Pugni L                             | 12-2020 | Evaluation of Rooming-in Practice for Neonates Born to<br>Mothers With Severe Acute Respiratory Syndrome<br>Coronavirus 2 Infection in Italy.      | Italy              | original paper                 |  |
| Vogel JP; Tendal B; Giles M; Whitehead C; Burton<br>W; Chakraborty S; Cheyne S; Downton T; Fraile<br>Navarro D; Gleeson G; Gordon A; Hunt J; Kitschke J;<br>McDonald S; McDonnell N; Middleton P; Millard T;<br>Murano M; Oats J; Tate R; White H; Elliott J; Roach<br>V; Homer CSE | 12-2020 | Clinical care of pregnant and postpartum women with<br>COVID-19: Living recommendations from the National<br>COVID-19 Clinical Evidence Taskforce. | Australia          | rapid/living/scoping<br>review |  |
| Vu Hoang D; Cashin J; Gribble K; Marinelli K;<br>Mathisen R                                                                                                                                                                                                                         | 12-2020 | Misalignment of global COVID-19 breastfeeding and<br>newborn care guidelines with World Health<br>Organization recommendations.                    | global<br>spectrum | review of<br>recommendations   |  |
| Haiek LN; LeDrew M; Charette C; Bartick M                                                                                                                                                                                                                                           | 01-2021 | Shared decision-making for infant feeding and care<br>during the coronavirus disease 2019 pandemic.                                                | global<br>spectrum | a query of research            |  |
| Kalinka J; Wielgos M; Leszczynska-Gorzela B;<br>Piekarska A; Huras H; Sieroszewski P; Czajkowski K;<br>Wysocki J; Lauterbach R; Helwich E; Mazela J                                                                                                                                 | 01-2021 | COVID-19 impact on perinatal care: risk factors, clinical<br>manifestation and prophylaxis. Polish experts' opinion<br>for December 2020.          | Poland             | a query of research            |  |
| Kotlar, B.; Gerson, E.; Petrillo, S.; Langer, A.;<br>Tiemeier, H.                                                                                                                                                                                                                   | 01-2021 | The impact of the COVID-19 pandemic on maternal and<br>perinatal health: a scoping review                                                          | global<br>spectrum | rapid/living/scoping<br>review |  |
| Cardoso, P.C.; de Sousa, T.M.; Rocha, D.D.S.; de<br>Menezes, L.R.D.; Dos Santos, L.C.                                                                                                                                                                                               | 02-2021 | Maternal and child health in the context of COVID-19<br>pandemic: evidence, recommendations and challenges                                         | Brazil             | a query of research            |  |

|                                                                                                                                                                                                                                                                                                                                                                                                                                                                                                          |         |                                                                                                                                          |                 |                             |
|----------------------------------------------------------------------------------------------------------------------------------------------------------------------------------------------------------------------------------------------------------------------------------------------------------------------------------------------------------------------------------------------------------------------------------------------------------------------------------------------------------|---------|------------------------------------------------------------------------------------------------------------------------------------------|-----------------|-----------------------------|
| de Oliveira, M.A.; Silva, N.É.F.; Pereira, J.C.N.; da Silva, S.L.; Caminha, M.F.C.; de Paula, W.K.A.S.; Quirino, G.D.S.; de Oliveira, D.R.; Cruz, R.S.B.L.C.                                                                                                                                                                                                                                                                                                                                             | 02-2021 | Recommendations for perinatal care in the context of the COVID-19 pandemic                                                               | Brazil          | a query of research         |
| Rollins, N.; Minckas, N.; Jehan, F.; Lodha, R.; Raiten, D.; Thorne, C.; Van de Perre, P.; Ververs, M.; Walker, N.; Bahl, R.; Victora, C. G.; Chil, Who Covid-Maternal Newborn; Newborn and Infant Feeding, Working                                                                                                                                                                                                                                                                                       | 02-2021 | A public health approach for deciding policy on infant feeding and mother & ndash;infant contact in the context of COVID-19              | global spectrum | a query of research         |
| Spatz, D.L.; Davanzo, R.; Müller, J.A.; Powell, R.; Rigourd, V.; Yates, A.; Geddes, D.T.; van Goudoever, J.B.; Bode, L.                                                                                                                                                                                                                                                                                                                                                                                  | 02-2021 | Promoting and Protecting Human Milk and Breastfeeding in a COVID-19 World                                                                | global spectrum | a query of research         |
| Tolu, L.B.; Feyissa, G.T.; Jeldu, W.G.                                                                                                                                                                                                                                                                                                                                                                                                                                                                   | 02-2021 | Guidelines and best practice recommendations on reproductive health services provision amid COVID-19 pandemic: scoping review            | global spectrum | rapid/living/scoping review |
| Bartick MC; Valdés V; Giusti A; Chapin EM; Bhana NB; Hernández-Aguilar MT; Duarte ED; Jenkins L; Gaughan J; Feldman-Winter L                                                                                                                                                                                                                                                                                                                                                                             | 03-2021 | Maternal and Infant Outcomes Associated with Maternity Practices Related to COVID-19: The COVID Mothers Study.                           | global spectrum | original paper              |
| Gonçalves-Ferri, W.A.; Pereira-Cellini, F.M.; Coca, K.; Aragon, D.C.; Nader, P.; Lyra, J.C.; do Vale, M.S.; Marba, S.; Araujo, K.; Dias, L.A.; de Lima Mota Ferreira, D.M.; Nieto, G.; Anchieta, L.M.; de Cássia Silveira, R.; de Moura, M.D.R.; Tuma Calil, V.M.L.; Moraes, V.C.C.; de Almeida, J.H.C.L.; Magalhães, M.; Sonini, T.C.B.; Javorsky, J.B.; Ribeiro, É.L.A.; Ferreira, R.; de Almeida, L.D.C.; Garbers, R.; da Silva Faria, G.M.; Roosch, A.; de Mesquita, A.R.A.; de Oliveira Pinto, R.M. | 03-2021 | The impact of coronavirus outbreak on breastfeeding guidelines among Brazilian hospitals and maternity services: a cross-sectional study | Brazil          | original paper              |
| Olonan-Jusi E; Zambrano PG; Duong VH; Anh NTT; Aye NSS; Chua MC; Kurniasari H; Moe ZW; Ngercham S; Phuong NTT; Datu-Sanguyo J                                                                                                                                                                                                                                                                                                                                                                            | 03-2021 | Human milk banks in the response to COVID-19: a statement of the regional human milk bank network for Southeast Asia and beyond.         | Southeast Asia  | review of recommendations   |
| van Veenendaal NR; Deierl A; Bacchini F; O'Brien K; Franck LS                                                                                                                                                                                                                                                                                                                                                                                                                                            | 03-2021 | Supporting parents as essential care partners in neonatal units during the SARS-CoV-2 pandemic.                                          | global spectrum | systematic review           |



|                                                                                                                                                                                                                                      |         |                                                                                                                                        |                 |                             |
|--------------------------------------------------------------------------------------------------------------------------------------------------------------------------------------------------------------------------------------|---------|----------------------------------------------------------------------------------------------------------------------------------------|-----------------|-----------------------------|
| Cavicchiolo, M.E.; Trevisanuto, D.; Priante, E.; Moschino, L.; Mosca, F.; Baraldi, E.                                                                                                                                                | 04-2021 | Italian neonatologists and SARS-CoV-2: lessons learned to face coming new waves                                                        | Italy           | systematic review           |
| Flannery, D.D.; Puopolo, K.M.                                                                                                                                                                                                        | 04-2021 | Perinatal COVID-19: guideline development, implementation, and challenges                                                              | USA             | review of recommendations   |
| Geffner SC; Ávila AS; Etcharrán ML; Fernández AL; Mariani GL; Vain NE                                                                                                                                                                | 04-2021 | Preparedness strategies in neonatology units during the COVID-19 pandemic: A survey conducted at maternity centers in Argentina.       | Argentina       | original paper              |
| Giusti A; Zambri F; Marchetti F; Corsi E; Preziosi J; Sampaolo L; Pizzi E; Taruscio D; Salerno P; Chiantera A; Colacurci N; Davanzo R; Mosca F; Petrini F; Ramenghi L; Vicario M; Villani A; Viora E; Zanetto F; Chapin EM; Donati S | 04-2021 | COVID-19 and pregnancy, childbirth, and breastfeeding: the interim guidance of the Italian National Institute of Health.               | Italy           | review of recommendations   |
| Hosono, S.; Isayama, T.; Sugiura, T.; Kusakawa, I.; Kamei, Y.; Ibara, S.; Tamura, M.; Ishikawa, G.; Enomoto, K.; Okuda, M.; Tanaka, H.; Masaoka, N.; Arahori, H.; Kubo, M.; Shimaoka, H.; Wada, M.                                   | 04-2021 | Management of infants born to mothers with suspected or confirmed SARS-CoV-2 infection in the delivery room: A tentative proposal 2020 | Japan           | review of recommendations   |
| Pountoukidou, A.; Potamiti-Komi, M.; Sarri, V.; Papapanou, M.; Routsi, E.; Tsiatsiani, A.M.; Vlahos, N.; Siristatidis, C.                                                                                                            | 04-2021 | Management and prevention of COVID-19 in pregnancy and pandemic obstetric care: A review of current practices                          | global spectrum | rapid/living/scoping review |
| Vassilopoulou E; Feketea G; Koumbi L; Mesiari C; Berghea EC; Konstantinou GN                                                                                                                                                         | 04-2021 | Breastfeeding and COVID-19: From Nutrition to Immunity.                                                                                | global spectrum | systematic review           |
| Wszolek KM; Chmaj-Wierzchowska K; Wilczak M                                                                                                                                                                                          | 04-2021 | Management of birth, postpartum care and breastfeeding - Polish recommendations and guidelines during SARS-CoV-2 pandemic.             | Poland          | review of recommendations   |
| Yeo KT; Biswas A; Ho SKY; Kong JY; Bharadwaj S; Chinnadurai A; Yip WY; Ab Latiff NF; Quek BH; Yeo CL; Ng YPM; Ee KTT; Chua MC; Poon WB; Amin Z                                                                                       | 04-2021 | Guidance for the clinical management of infants born to mothers with suspected/confirmed COVID-19 in Singapore.                        | global spectrum | a query of research         |
| Devarajan J; Chiang E; Cummings KC 3rd                                                                                                                                                                                               | 05-2021 | Pregnancy and delivery considerations during COVID-19.                                                                                 | global spectrum | a query of research         |
| Ross-Davie M; Brodrick A; Randall W; Kerrigan A; McSherry M                                                                                                                                                                          | 06-2021 | 2. Labour and birth.                                                                                                                   | UK              | a query of research         |
