# Supplementary material for: Protecting Breastfeeding during the COVID-19 Pandemic: A Scoping Review of Perinatal Care Recommendations in the Context of Maternal and Child Well-Being
Source: MDPI journal article supplement (doi:10.3390/ijerph19063347), 2022-03-11
Supplement: s1 [file s1]

**Supplementary Table S1.** Search strategy.

|                                   | (A)                                                                                                                                                                                                                                                                                        | AND (B)                                                         | AND (C)                                                                                                                | Timespan                                                    | Notes                                                                                                                                             |
|-----------------------------------|--------------------------------------------------------------------------------------------------------------------------------------------------------------------------------------------------------------------------------------------------------------------------------------------|-----------------------------------------------------------------|------------------------------------------------------------------------------------------------------------------------|-------------------------------------------------------------|---------------------------------------------------------------------------------------------------------------------------------------------------|
| Web of Science<br>Core Collection | “delivery” OR “labor”<br>OR “labour” OR “giving<br>birth” OR “breastmilk”<br>OR “human milk” OR<br>“donor milk” OR “own<br>mothers milk” OR<br>“breastfeeding” OR<br>“mother – infant<br>contact” OR “skin to<br>skin” OR “prenatal<br>care” OR “postnatal<br>care” OR “perinatal<br>care” | “COVID-19” OR “COVID19”<br>OR “coronavirus” OR “SARS-<br>CoV-2” | “recommendation” OR<br>“counseling” OR “policy” OR<br>“guidelines” OR “guidance” OR<br>“statement” OR “best practices” | Timespan: 2020-03-01 to<br>2021-05-31 (Publication<br>Date) | Each search string<br>All=(“A” AND “B” AND<br>“C”) was entered<br>separately                                                                      |
| Medline via<br>PubMed             | “delivery” OR “labor”<br>OR “labour” OR “giving<br>birth” OR “breastmilk”<br>OR “human milk” OR<br>“donor milk” OR “own<br>mothers milk” OR<br>“breastfeeding” OR<br>“mother – infant<br>contact” OR “skin to<br>skin” OR “prenatal<br>care” OR “postnatal<br>care” OR “perinatal<br>care” | “COVID-19” OR “COVID19”<br>OR “coronavirus” OR “SARS-<br>CoV-2” | “recommendation” OR<br>“counseling” OR “policy” OR<br>“guidelines” OR “guidance” OR<br>“statement” OR “best practices” | (2020/3/1:2021/5/31[pdat])                                  | Each search string<br>("A"[All Fields] AND<br>"B"[All Fields] AND<br>"C"[All Fields]) AND<br>(2020/3/1:2021/5/31[pdat])<br>was entered separately |

|        |                                                                                                                                                                                                                                                        |                                                          |                                                                                                               |                                   |                                                                                                                                                                                                                                       |
|--------|--------------------------------------------------------------------------------------------------------------------------------------------------------------------------------------------------------------------------------------------------------|----------------------------------------------------------|---------------------------------------------------------------------------------------------------------------|-----------------------------------|---------------------------------------------------------------------------------------------------------------------------------------------------------------------------------------------------------------------------------------|
| Scopus | “delivery” OR “labor” OR “labour” OR “giving birth” OR “breastmilk” OR “human milk” OR “donor milk” OR “own mothers milk” OR “breastfeeding” OR “mother – infant contact” OR “skin to skin” OR “prenatal care” OR “postnatal care” OR “perinatal care” | “COVID-19” OR “COVID19” OR “coronavirus” OR “SARS-CoV-2” | “recommendation” OR “counseling” OR “policy” OR “guidelines” OR “guidance” OR “statement” OR “best practices” | PUBYEAR > 2019 AND PUBYEAR < 2022 | Each search string ( TITLE-ABS-KEY ( “A” AND “B” AND “C”) AND PUBYEAR > 2019 AND PUBYEAR < 2022 was entered separately Publications earlier than 1 of March 2020 and later than 31 of May 2021 were manually excluded from the export |
|--------|--------------------------------------------------------------------------------------------------------------------------------------------------------------------------------------------------------------------------------------------------------|----------------------------------------------------------|---------------------------------------------------------------------------------------------------------------|-----------------------------------|---------------------------------------------------------------------------------------------------------------------------------------------------------------------------------------------------------------------------------------|
